# Supplementary material for: Interaction at the silicon/transition metal oxide heterojunction interface and its effect on the photovoltaic performance
Source: Royal Society of Chemistry journal article supplement (doi:10.1039/c5cp05309a), 2015-01-01
Supplement: c5cp05309a1.pdf [file c5cp05309a1.pdf]

## Supporting Information

### Interaction at the silicon/transition metal oxide heterojunction interface and its effect on the photovoltaic performance

Zhimin Liang<sup>1</sup>, Mingze Su<sup>1</sup>, Yangyang Zhou<sup>1</sup>, Li Gong<sup>2</sup>, Chuanxi Zhao<sup>1</sup>, Keqiu Chen<sup>1</sup>,  
Fangyan Xie<sup>2</sup>, Weihong Zhang<sup>2</sup>, Jian Chen<sup>2</sup>, Pengyi Liu<sup>1</sup>, Weiguang Xie<sup>1\*</sup>

1. Siyuan Laboratory, Department of Physics, Jinan University, Guangzhou, Guangdong, 510632, P R China
2. Instrumental Analysis & Research Center, Sun Yat-sen University, Guangzhou, 510275, P R China

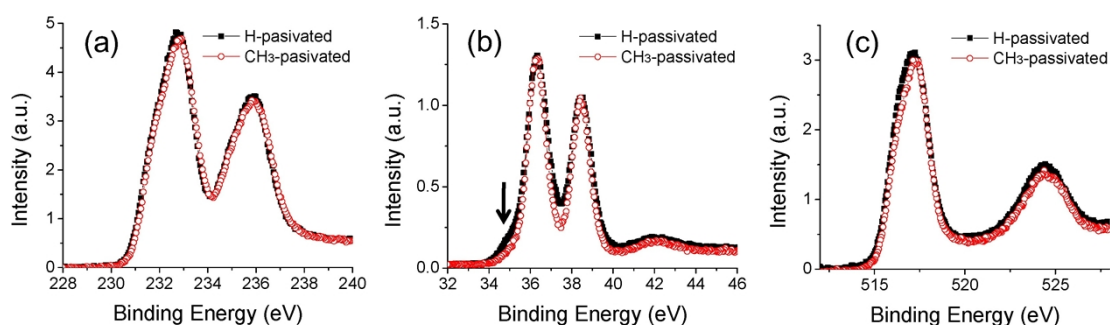

**Figure S1** (a) The Mo 3d peak of the MoO<sub>3-x</sub> thin film. (b) The W 4f peak of the WO<sub>3-x</sub> thin film. (c) The V 2p peak of the V<sub>2</sub>O<sub>5-x</sub> thin film.

\* Author to whom correspondence should be addressed: E-mail: [wgxie@email.jnu.edu.cn](mailto:wgxie@email.jnu.edu.cn)

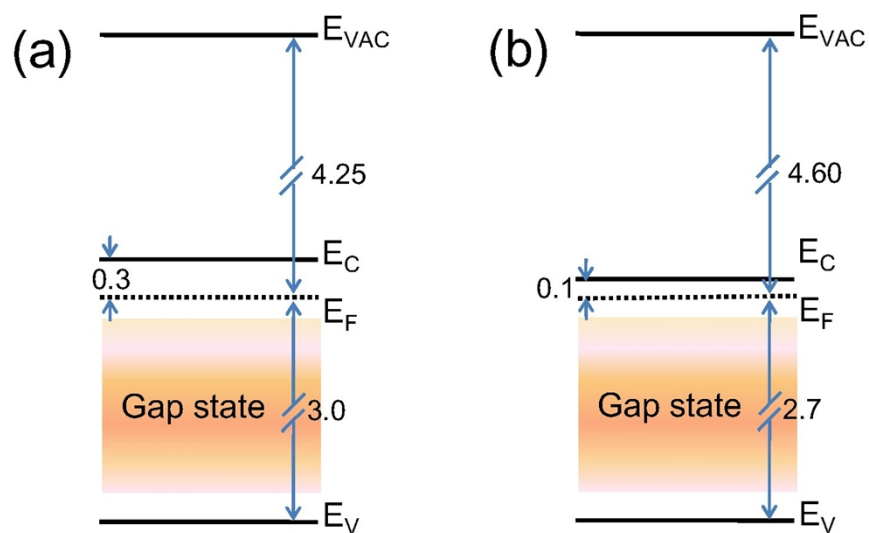

**Figure S2** (a) the band structure of  $\text{WO}_3$ . (b) The band structure of  $\text{V}_2\text{O}_{5-x}$ . In these two materials, the vacuum level, conduction and valance band are the same on H-Si and  $\text{CH}_3\text{-Si}$ .
